# Supplementary material for: NaCl-promoted phase transition and glycosidic bond cleavage under microwave heating for energy-efficient biorefinery of rice starch
Source: Royal Society of Chemistry journal article supplement (doi:10.1039/d0gc01761b), 2020-01-01
Supplement: d0gc01761b1.pdf [file d0gc01761b1.pdf]

## Supporting Information

### **NaCl-promoted phase transition and glycosidic bond cleavage under microwave for energy-efficient biorefinery of rice starch**

Iris K.M. Yu <sup>a,b</sup>, Jiajun Fan <sup>a,#</sup>, Vitaliy L. Budarin <sup>a,^</sup>, Florent P. Bouxin <sup>a</sup>, James H. Clark <sup>a</sup>, Daniel C.W. Tsang <sup>b,\*</sup>

<sup>a</sup> Green Chemistry Centre of Excellence, Department of Chemistry, University of York, York, YO10 5DD, UK

<sup>b</sup> Department of Civil and Environmental Engineering, The Hong Kong Polytechnic University, Hung Hom, Kowloon, Hong Kong, China

*#Corresponding author:* [alice.fan@york.ac.uk](mailto:alice.fan@york.ac.uk)

*^Corresponding author:* [vitaliy.budarin@york.ac.uk](mailto:vitaliy.budarin@york.ac.uk)

*\*Corresponding author:* [dan.tsang@polyu.edu.hk](mailto:dan.tsang@polyu.edu.hk)

**Text S1.** Rice starch conversion in FlexiWAVE

In a typical conversion experiment, the substrate, i.e., rice starch (Sigma Aldrich) of 2 g, was added to a Teflon vessel (100 mL) containing 40 mL water with the NaCl concentration of 0-20 wt.% (with respect to water), followed by magnetic stirring to obtain a homogeneous mixture. The mixture was then heated in a FlexiWAVE microwave reactor (Milestone) with a fibre optic sensor inserted in the vessel centre, which measured the internal temperature to achieve programmed heating by varying power output. A constant ramp rate of 32 °C min<sup>-1</sup> was used, which normally allowed well-controlled temperature increase without overshoot. Heating at the target temperature of 180-200 °C was kept for 15 min, followed by forced ventilation to cool the reaction vessels to room temperature. Liquid samples were subjected to product analysis after a four-fold dilution in water and filtration through a 0.2-µm regenerated cellulose membrane.

**Text S2.** Preparation and conversion of pre-gelatinised starch in FlexiWAVE

Starch (2 g) was pre-gelatinised via ramping to 200 °C (no holding time) in 40 mL water in FlexiWAVE. After cooling to room temperature, the starch gel was retained in the reaction vessel, and NaCl<sub>(s)</sub> was added (loading = 1 wt.% with respect to water), followed by thorough mixing with a glass rod. The mixture was then heated in FlexiWAVE for 15 min at a reaction temperature of 190 °C, following the procedures described above. A control experiment was carried out with the same protocol in the absence of salt.

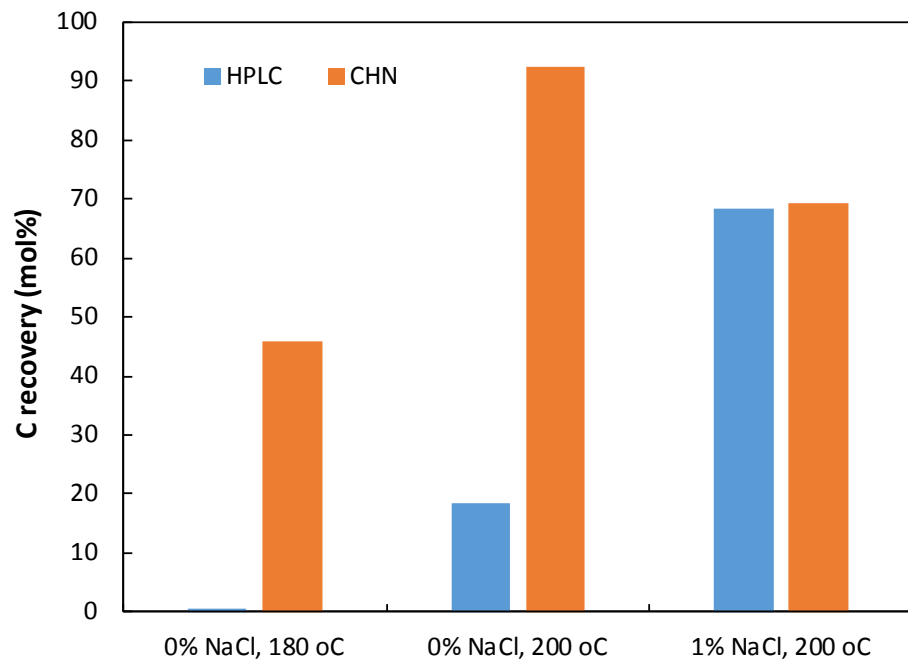

**Figure S1.** Carbon recovery revealed by HPLC and CHN analyses for starch conversion for a holding time of 15 min in FlexiWAVE.

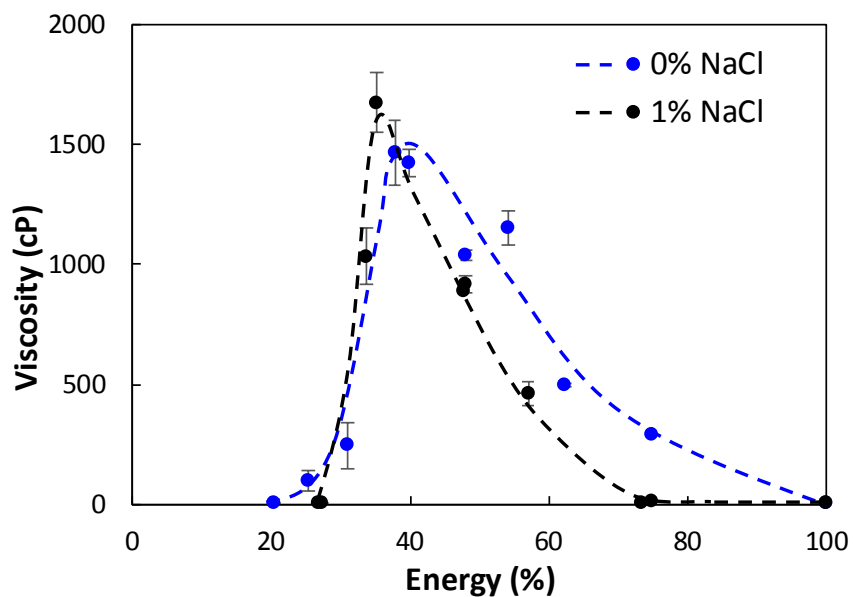

**Figure S2.** Viscosity of starch gel samples as a function of energy (% of total energy in the respective system) at different temperatures during ramping in FlexiWAVE. The total energy for the ramping was estimated at 389 kJ in 0% NaCl and 353 kJ in 1% NaCl.
